# Supplementary material for: Skin microbiota in frogs from the Brazilian Atlantic Forest: Species, forest type, and potential against pathogens
Source: PubMed Central journal article supplement (PMC5497969; doi:10.1371/journal.pone.0179628), 2017-07-05
Supplement: pone.0179628.s001.pdf [file pone.0179628.s001.pdf]

| Individual | Species               | Forest type | Sampling site | Bacterial density (CFU/mL) | Morphotypes |
|------------|-----------------------|-------------|---------------|----------------------------|-------------|
| USV116     | <i>A. leucopygius</i> | Continuous  | USV           | 4,67E+03                   | 0           |
| USV117     | <i>A. leucopygius</i> | Continuous  | USV           | 1,00E+03                   | 0           |
| USV118     | <i>A. leucopygius</i> | Continuous  | USV           | 3,00E+03                   | 0           |
| USV160     | <i>A. leucopygius</i> | Continuous  | USV           | 6,53E+04                   | 0           |
| USV161     | <i>A. leucopygius</i> | Continuous  | USV           | 7,00E+03                   | 0           |
| USV162     | <i>A. leucopygius</i> | Continuous  | USV           | 0,00E+00                   | 0           |
| USV163     | <i>A. leucopygius</i> | Continuous  | USV           | 6,67E+02                   | 0           |
| USV164     | <i>A. leucopygius</i> | Continuous  | USV           | 8,33E+03                   | 0           |
| USV165     | <i>A. leucopygius</i> | Continuous  | USV           | 1,00E+03                   | 0           |
| USV85      | <i>A. leucopygius</i> | Continuous  | USV           | 2,67E+04                   | 2           |
| USV96      | <i>A. leucopygius</i> | Continuous  | USV           | 0,00E+00                   | 0           |
| USV97      | <i>A. leucopygius</i> | Continuous  | USV           | 1,00E+03                   | 2           |
| USV98      | <i>A. leucopygius</i> | Continuous  | USV           | 1,00E+03                   | 2           |
| USV99      | <i>A. leucopygius</i> | Continuous  | USV           | 5,07E+04                   | 3           |
| SLP120     | <i>A. leucopygius</i> | Fragmented  | SLP.1         | 2,67E+03                   | 0           |
| SLP121     | <i>A. leucopygius</i> | Fragmented  | SLP.1         | 3,33E+02                   | 0           |
| SLP122     | <i>A. leucopygius</i> | Fragmented  | SLP.1         | 6,67E+02                   | 0           |
| SLP123     | <i>A. leucopygius</i> | Fragmented  | SLP.1         | 2,33E+03                   | 0           |
| SLP146     | <i>A. leucopygius</i> | Fragmented  | SLP.1         | 0,00E+00                   | 0           |
| SLP147     | <i>A. leucopygius</i> | Fragmented  | SLP.1         | 3,33E+02                   | 0           |
| SLP154     | <i>A. leucopygius</i> | Fragmented  | SLP.1         | 3,00E+03                   | 0           |
| SLP155     | <i>A. leucopygius</i> | Fragmented  | SLP.1         | 4,27E+04                   | 0           |
| SLP156     | <i>A. leucopygius</i> | Fragmented  | SLP.1         | 4,50E+04                   | 0           |
| SLP157     | <i>A. leucopygius</i> | Fragmented  | SLP.1         | 1,47E+04                   | 0           |
| SLP158     | <i>A. leucopygius</i> | Fragmented  | SLP.1         | 2,67E+03                   | 0           |
| SLP159     | <i>A. leucopygius</i> | Fragmented  | SLP.1         | 3,67E+03                   | 0           |
| SLP100     | <i>A. leucopygius</i> | Fragmented  | SLP.1         | 2,45E+05                   | 1           |
| SLP16      | <i>A. leucopygius</i> | Fragmented  | SLP.1         | 6,00E+03                   | 3           |
| INT199     | <i>D. minutus</i>     | Continuous  | INT           | 5,00E+02                   | 0           |
| INT200     | <i>D. minutus</i>     | Continuous  | INT           | 1,67E+02                   | 0           |
| INT201     | <i>D. minutus</i>     | Continuous  | INT           | 1,70E+03                   | 0           |
| INT202     | <i>D. minutus</i>     | Continuous  | INT           | 7,30E+04                   | 0           |
| INT203     | <i>D. minutus</i>     | Continuous  | INT           | 1,16E+05                   | 0           |
| INT204     | <i>D. minutus</i>     | Continuous  | INT           | 2,63E+04                   | 0           |
| INT72      | <i>D. minutus</i>     | Continuous  | INT           | 1,57E+04                   | 0           |
| INT73      | <i>D. minutus</i>     | Continuous  | INT           | 1,10E+04                   | 3           |
| INT74      | <i>D. minutus</i>     | Continuous  | INT           | 6,67E+02                   | 1           |
| INT75      | <i>D. minutus</i>     | Continuous  | INT           | 5,33E+03                   | 2           |
| INT76      | <i>D. minutus</i>     | Continuous  | INT           | 3,67E+03                   | 3           |
| INT77      | <i>D. minutus</i>     | Continuous  | INT           | 3,33E+02                   | 0           |
| INT78      | <i>D. minutus</i>     | Continuous  | INT           | 6,67E+02                   | 0           |
| INT79      | <i>D. minutus</i>     | Continuous  | INT           | 9,00E+03                   | 0           |

|         |                   |            |      |              |   |
|---------|-------------------|------------|------|--------------|---|
| INT80   | <i>D. minutus</i> | Continuous | INT  | 2,17E+04     | 0 |
| INT81   | <i>D. minutus</i> | Continuous | INT  | 3,75E+05     | 0 |
| INT82   | <i>D. minutus</i> | Continuous | INT  | 3,33E+03     | 0 |
| USV105  | <i>D. minutus</i> | Continuous | USV  | 0,00E+00     | 0 |
| USV106  | <i>D. minutus</i> | Continuous | USV  | 1,67E+03     | 0 |
| USV 107 | <i>D. minutus</i> | Continuous | USV  | 2,67E+03     | 0 |
| USV108  | <i>D. minutus</i> | Continuous | USV  | 2,67E+03     | 0 |
| USV109  | <i>D. minutus</i> | Continuous | USV  | 7,00E+03     | 0 |
| USV110  | <i>D. minutus</i> | Continuous | USV  | 4,67E+03     | 0 |
| USV111  | <i>D. minutus</i> | Continuous | USV  | 7,33E+03     | 0 |
| USV112  | <i>D. minutus</i> | Continuous | USV  | 5,67E+03     | 0 |
| USV113  | <i>D. minutus</i> | Continuous | USV  | 7,33E+03     | 0 |
| USV114  | <i>D. minutus</i> | Continuous | USV  | 1,33E+03     | 0 |
| USV115  | <i>D. minutus</i> | Continuous | USV  | 4,33E+03     | 0 |
| USV136  | <i>D. minutus</i> | Continuous | USV  | 6,67E+02     | 0 |
| USV137  | <i>D. minutus</i> | Continuous | USV  | 4,13E+04     | 0 |
| USV138  | <i>D. minutus</i> | Continuous | USV  | 6,67E+02     | 0 |
| USV139  | <i>D. minutus</i> | Continuous | USV  | 3,33E+02     | 0 |
| USV140  | <i>D. minutus</i> | Continuous | USV  | 6,67E+02     | 0 |
| USV141  | <i>D. minutus</i> | Continuous | USV  | 3,33E+02     | 0 |
| USV142  | <i>D. minutus</i> | Continuous | USV  | 3,33E+02     | 0 |
| USV143  | <i>D. minutus</i> | Continuous | USV  | 1,00E+03     | 0 |
| USV144  | <i>D. minutus</i> | Continuous | USV  | 3,57E+04     | 0 |
| USV145  | <i>D. minutus</i> | Continuous | USV  | 3,33E+02     | 0 |
| USV171  | <i>D. minutus</i> | Continuous | USV  | 1,00E+03     | 0 |
| USV172  | <i>D. minutus</i> | Continuous | USV  | 1,00E+03     | 0 |
| USV83   | <i>D. minutus</i> | Continuous | USV  | 0,00E+00     | 0 |
| USV84   | <i>D. minutus</i> | Continuous | USV  | 0,00E+00     | 0 |
| USV86   | <i>D. minutus</i> | Continuous | USV  | 0,00E+00     | 0 |
| USV87   | <i>D. minutus</i> | Continuous | USV  | 0,00E+00     | 0 |
| USV88   | <i>D. minutus</i> | Continuous | USV  | 3,33E+02     | 0 |
| USV89   | <i>D. minutus</i> | Continuous | USV  | 0,00E+00     | 0 |
| USV90   | <i>D. minutus</i> | Continuous | USV  | 0,00E+00     | 0 |
| USV91   | <i>D. minutus</i> | Continuous | USV  | not included | 1 |
| USV92   | <i>D. minutus</i> | Continuous | USV  | 0,00E+00     | 0 |
| USV93   | <i>D. minutus</i> | Continuous | USV  | 0,00E+00     | 0 |
| USV94   | <i>D. minutus</i> | Continuous | USV  | 1,40E+04     | 0 |
| RG101   | <i>D. minutus</i> | Fragmented | RG.2 | 3,93E+04     | 4 |
| RG102   | <i>D. minutus</i> | Fragmented | RG.2 | 7,00E+03     | 4 |
| RG103   | <i>D. minutus</i> | Fragmented | RG.2 | 4,77E+04     | 6 |
| RG104   | <i>D. minutus</i> | Fragmented | RG.2 | 3,33E+03     | 1 |
| RG177   | <i>D. minutus</i> | Fragmented | RG.2 | 2,00E+03     | 0 |
| RG178   | <i>D. minutus</i> | Fragmented | RG.2 | 1,97E+04     | 0 |
| RG179   | <i>D. minutus</i> | Fragmented | RG.2 | 4,00E+03     | 0 |
| RG180   | <i>D. minutus</i> | Fragmented | RG.2 | 1,33E+03     | 0 |
| RG181   | <i>D. minutus</i> | Fragmented | RG.2 | 5,33E+03     | 0 |

|        |                   |            |       |          |    |
|--------|-------------------|------------|-------|----------|----|
| RG182  | <i>D. minutus</i> | Fragmented | RG.2  | 0,00E+00 | 0  |
| RG183  | <i>D. minutus</i> | Fragmented | RG.2  | 0,00E+00 | 0  |
| RG184  | <i>D. minutus</i> | Fragmented | RG.2  | 3,33E+03 | 0  |
| RG185  | <i>D. minutus</i> | Fragmented | RG.2  | 3,33E+02 | 0  |
| RG186  | <i>D. minutus</i> | Fragmented | RG.2  | 3,00E+03 | 0  |
| RG187  | <i>D. minutus</i> | Fragmented | RG.2  | 6,67E+02 | 0  |
| RG188  | <i>D. minutus</i> | Fragmented | RG.2  | 0,00E+00 | 0  |
| SLP132 | <i>D. minutus</i> | Fragmented | SLP.2 | 0,00E+00 | 1  |
| SLP133 | <i>D. minutus</i> | Fragmented | SLP.2 | 0,00E+00 | 0  |
| SLP134 | <i>D. minutus</i> | Fragmented | SLP.2 | 0,00E+00 | 0  |
| SLP135 | <i>D. minutus</i> | Fragmented | SLP.2 | 0,00E+00 | 0  |
| SLP173 | <i>D. minutus</i> | Fragmented | SLP.2 | 8,77E+04 | 0  |
| SLP175 | <i>D. minutus</i> | Fragmented | SLP.2 | 6,00E+03 | 0  |
| SLP176 | <i>D. minutus</i> | Fragmented | SLP.2 | 2,00E+03 | 0  |
| INT192 | <i>P. boiei</i>   | Continuous | INT   | 2,01E+04 | 0  |
| INT193 | <i>P. boiei</i>   | Continuous | INT   | 9,17E+03 | 0  |
| INT194 | <i>P. boiei</i>   | Continuous | INT   | 2,22E+04 | 0  |
| INT195 | <i>P. boiei</i>   | Continuous | INT   | 6,77E+03 | 0  |
| INT196 | <i>P. boiei</i>   | Continuous | INT   | 9,07E+03 | 0  |
| INT197 | <i>P. boiei</i>   | Continuous | INT   | 2,30E+04 | 0  |
| INT198 | <i>P. boiei</i>   | Continuous | INT   | 3,80E+04 | 0  |
| INT33  | <i>P. boiei</i>   | Continuous | INT   | 2,73E+05 | 0  |
| INT34  | <i>P. boiei</i>   | Continuous | INT   | 2,77E+05 | 1  |
| INT35  | <i>P. boiei</i>   | Continuous | INT   | 2,00E+05 | 4  |
| INT36  | <i>P. boiei</i>   | Continuous | INT   | 1,93E+04 | 0  |
| INT37  | <i>P. boiei</i>   | Continuous | INT   | 1,20E+05 | 4  |
| INT38  | <i>P. boiei</i>   | Continuous | INT   | 1,21E+05 | 0  |
| INT39  | <i>P. boiei</i>   | Continuous | INT   | 1,29E+05 | 0  |
| INT40  | <i>P. boiei</i>   | Continuous | INT   | 4,88E+05 | 1  |
| INT70  | <i>P. boiei</i>   | Continuous | INT   | 2,43E+05 | 2  |
| INT71  | <i>P. boiei</i>   | Continuous | INT   | 1,63E+04 | 0  |
| USV166 | <i>P. boiei</i>   | Continuous | USV   | 6,70E+04 | 0  |
| USV167 | <i>P. boiei</i>   | Continuous | USV   | 2,01E+05 | 0  |
| USV168 | <i>P. boiei</i>   | Continuous | USV   | 6,73E+04 | 0  |
| USV169 | <i>P. boiei</i>   | Continuous | USV   | 2,20E+05 | 0  |
| USV95  | <i>P. boiei</i>   | Continuous | USV   | 1,93E+05 | 10 |
| RG189  | <i>P. boiei</i>   | Fragmented | RG.1  | 2,31E+05 | 0  |
| RG190  | <i>P. boiei</i>   | Fragmented | RG.1  | 1,14E+05 | 0  |
| RG191  | <i>P. boiei</i>   | Fragmented | RG.1  | 1,50E+05 | 0  |
| RG28   | <i>P. boiei</i>   | Fragmented | RG.1  | 3,18E+05 | 22 |
| RG29   | <i>P. boiei</i>   | Fragmented | RG.1  | 1,90E+05 | 14 |
| RG30   | <i>P. boiei</i>   | Fragmented | RG.1  | 2,88E+05 | 13 |
| RG31   | <i>P. boiei</i>   | Fragmented | RG.1  | 1,46E+05 | 5  |
| RG32   | <i>P. boiei</i>   | Fragmented | RG.1  | 1,37E+05 | 1  |
| RG56   | <i>P. boiei</i>   | Fragmented | RG.1  | 2,11E+05 | 4  |
| RG57   | <i>P. boiei</i>   | Fragmented | RG.1  | 2,01E+05 | 1  |

|        |                     |            |       |              |              |
|--------|---------------------|------------|-------|--------------|--------------|
| RG58   | <i>P. boiei</i>     | Fragmented | RG.1  | 2,41E+05     | 2            |
| RG59   | <i>P. boiei</i>     | Fragmented | RG.1  | 2,55E+05     | 0            |
| SLP124 | <i>P. boiei</i>     | Fragmented | SLP.1 | 1,95E+05     | 11           |
| SLP125 | <i>P. boiei</i>     | Fragmented | SLP.1 | 1,95E+05     | 3            |
| SLP126 | <i>P. boiei</i>     | Fragmented | SLP.1 | 1,88E+05     | 0            |
| SLP127 | <i>P. boiei</i>     | Fragmented | SLP.1 | 2,18E+05     | 2            |
| SLP128 | <i>P. boiei</i>     | Fragmented | SLP.1 | 1,46E+05     | 2            |
| SLP129 | <i>P. boiei</i>     | Fragmented | SLP.1 | 3,89E+05     | 0            |
| SLP130 | <i>P. boiei</i>     | Fragmented | SLP.1 | 1,42E+05     | 0            |
| SLP131 | <i>P. boiei</i>     | Fragmented | SLP.1 | 3,50E+04     | 0            |
| SLP148 | <i>P. boiei</i>     | Fragmented | SLP.1 | 1,54E+05     | 1            |
| SLP149 | <i>P. boiei</i>     | Fragmented | SLP.1 | 1,28E+06     | 1            |
| SLP150 | <i>P. boiei</i>     | Fragmented | SLP.1 | 3,23E+05     | 1            |
| SLP151 | <i>P. boiei</i>     | Fragmented | SLP.1 | 9,93E+05     | 0            |
| SLP152 | <i>P. boiei</i>     | Fragmented | SLP.1 | 1,13E+05     | 1            |
| SLP1   | <i>P. boiei</i>     | Fragmented | SLP.1 | 1,68E+05     | 0            |
| SLP2   | <i>P. boiei</i>     | Fragmented | SLP.1 | 6,85E+04     | 14           |
| SLP3   | <i>P. boiei</i>     | Fragmented | SLP.1 | 1,67E+05     | 3            |
| SLP4   | <i>P. boiei</i>     | Fragmented | SLP.1 | 1,54E+05     | 5            |
| SLP5   | <i>P. boiei</i>     | Fragmented | SLP.1 | 1,45E+05     | 0            |
| INT18  | <i>P. distincta</i> | Continuous | INT   | not included | not included |
| INT19  | <i>P. distincta</i> | Continuous | INT   | 1,38E+05     | 1            |
| INT20  | <i>P. distincta</i> | Continuous | INT   | 1,00E+03     | 3            |
| INT205 | <i>P. distincta</i> | Continuous | INT   | 5,33E+03     | 0            |
| INT206 | <i>P. distincta</i> | Continuous | INT   | 1,37E+05     | 0            |
| INT207 | <i>P. distincta</i> | Continuous | INT   | 3,30E+04     | 0            |
| INT208 | <i>P. distincta</i> | Continuous | INT   | 1,14E+05     | 0            |
| INT21  | <i>P. distincta</i> | Continuous | INT   | 1,38E+05     | 0            |
| INT22  | <i>P. distincta</i> | Continuous | INT   | 8,75E+04     | 3            |
| INT23  | <i>P. distincta</i> | Continuous | INT   | 1,05E+05     | 2            |
| INT24  | <i>P. distincta</i> | Continuous | INT   | 9,95E+04     | 0            |
| INT25  | <i>P. distincta</i> | Continuous | INT   | 1,41E+05     | 0            |
| INT26  | <i>P. distincta</i> | Continuous | INT   | 2,50E+04     | 3            |
| INT27  | <i>P. distincta</i> | Continuous | INT   | 5,09E+05     | 3            |
| INT68  | <i>P. distincta</i> | Continuous | INT   | 1,08E+05     | 4            |
| INT69  | <i>P. distincta</i> | Continuous | INT   | 3,33E+03     | 2            |
| RG46   | <i>P. distincta</i> | Fragmented | RG.1  | 1,50E+04     | 0            |
| RG47   | <i>P. distincta</i> | Fragmented | RG.1  | 2,00E+03     | 0            |
| RG48   | <i>P. distincta</i> | Fragmented | RG.1  | 7,67E+03     | 0            |
| RG49   | <i>P. distincta</i> | Fragmented | RG.1  | 4,33E+03     | 0            |
| RG50   | <i>P. distincta</i> | Fragmented | RG.1  | 3,33E+02     | 0            |
| RG51   | <i>P. distincta</i> | Fragmented | RG.1  | 7,67E+03     | 0            |
| RG52   | <i>P. distincta</i> | Fragmented | RG.1  | 1,43E+04     | 0            |
| RG53   | <i>P. distincta</i> | Fragmented | RG.1  | 9,00E+03     | 4            |
| RG54   | <i>P. distincta</i> | Fragmented | RG.1  | 7,13E+04     | 0            |
| RG55   | <i>P. distincta</i> | Fragmented | RG.1  | 4,87E+04     | 12           |

|      |                     |            |      |              |              |
|------|---------------------|------------|------|--------------|--------------|
| RG60 | <i>P. distincta</i> | Fragmented | RG.1 | 8,67E+04     | 0            |
| RG61 | <i>P. distincta</i> | Fragmented | RG.1 | 6,33E+04     | 2            |
| RG62 | <i>P. distincta</i> | Fragmented | RG.1 | 3,87E+04     | 0            |
| RG63 | <i>P. distincta</i> | Fragmented | RG.1 | 4,00E+04     | 1            |
| RG64 | <i>P. distincta</i> | Fragmented | RG.1 | 7,14E+05     | 1            |
| RG65 | <i>P. distincta</i> | Fragmented | RG.1 | 1,53E+04     | 2            |
| RG66 | <i>P. distincta</i> | Fragmented | RG.1 | 1,25E+05     | 2            |
| RG67 | <i>P. distincta</i> | Fragmented | RG.1 | not included | not included |

**Abbreviations:** USV, Unit of Santa Virgínia; SLP, São Luís do Paraitinga city; INT, Intervalles - Paraíso farm; RG, Ribeirão Grande city. **Legend:** not included, samples which presented some problem during proceedings.
